# Supplementary material
Source: Springer Nature journal article supplement (https://www.springermedizin.de/resource/supplementary/13014_2013_1006_MOESM3_ESM.pdf/9634844)

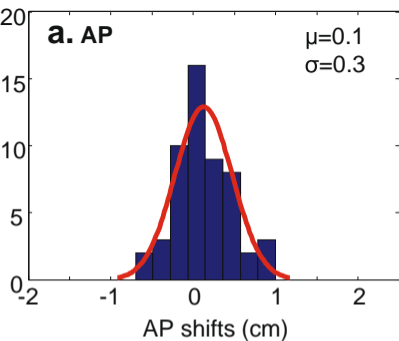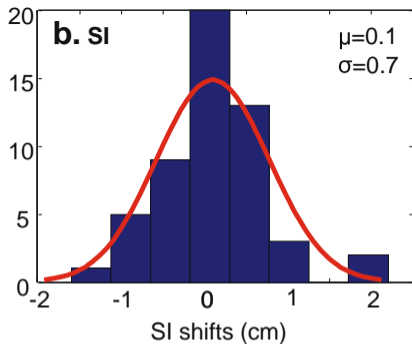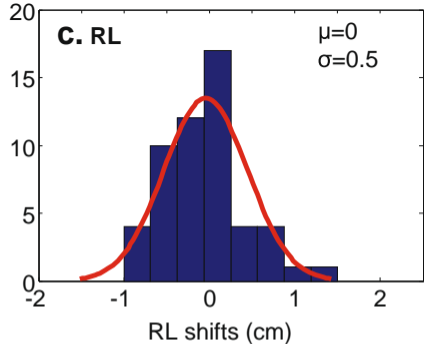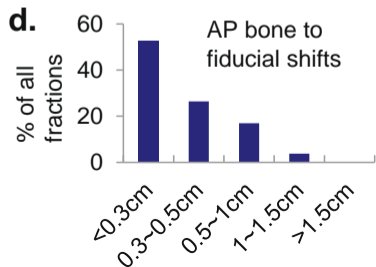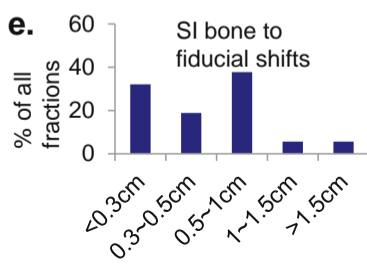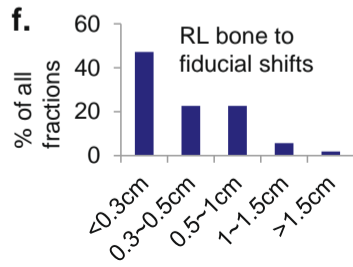

Supplement: MOESM3 [file 9634844]
